# Supplementary material for: ESR1 mutations are frequent in newly diagnosed metastatic and loco-regional recurrence of endocrine-treated breast cancer and carry worse prognosis
Source: Springer Nature journal article supplement (doi:10.1186/s13058-020-1246-5), 2020-02-03

**Supplementary Table S1:  
validation of Sequencing results by ddPCR.**

| Sample ID | sequencing |              | validation: ddPCR |                        |
|-----------|------------|--------------|-------------------|------------------------|
|           | position   | % reads      | position          | % fractional abundance |
| ESR 3     | D538G      | 6.86         | D538G             | 3.36                   |
| ESR 5     | D538G      | 39.30        | D538G             | 37.21                  |
| ESR 9     | D538G      | 7.93         | D538G             | 6.71                   |
| ESR 13    | D538G      | 1.97         | D538G             | 4.96                   |
| ESR 14    | D538G      | 45.57        | D538G             | 44.09                  |
| ESR 20b   | D538G      | 37.93        | D538G             | 37.97                  |
| ESR 40    | D538G      | 42.74        | D538G             | 41.94                  |
| ESR 73    | D538G      | 1.01         | D538G             | 10.93                  |
| ESR 6     | D538G      | not detected | D538G             | not detected           |
| ESR 20a   | D538G      | not detected | D538G             | not detected           |
| ESR 50    | D538G      | not detected | D538G             | not detected           |
| ESR 71    | D538G      | not detected | D538G             | not detected           |

Figure S1:  
DFS and OS for the metastatic cohort

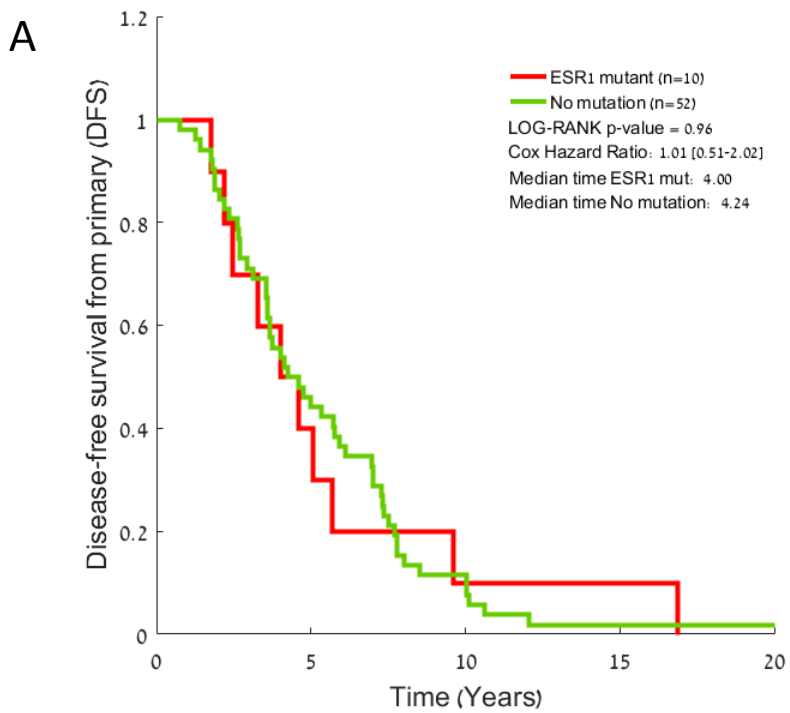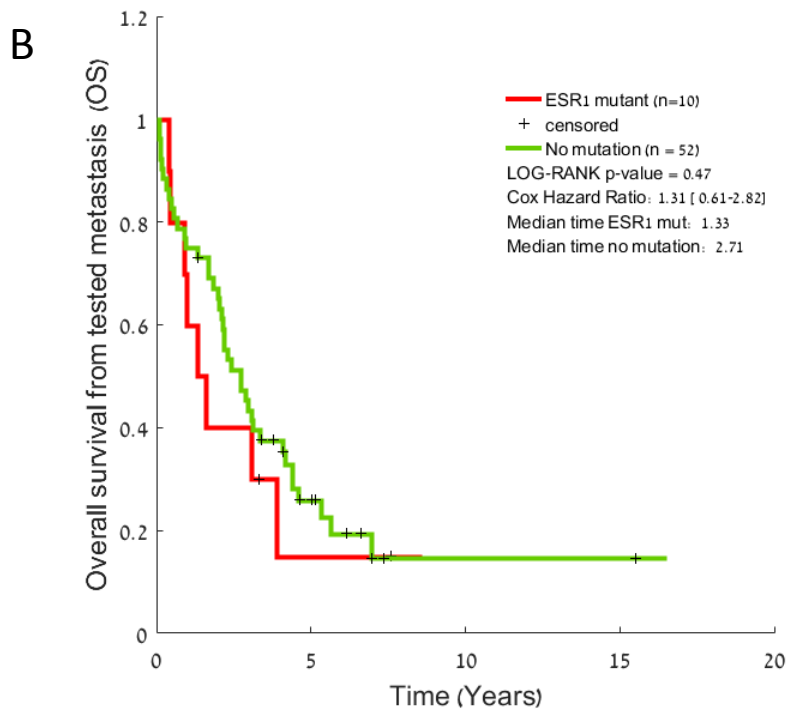

Figure S2:

RFS, DFS and DRFS for the loco-regional cohort: mutant vs. WT

A

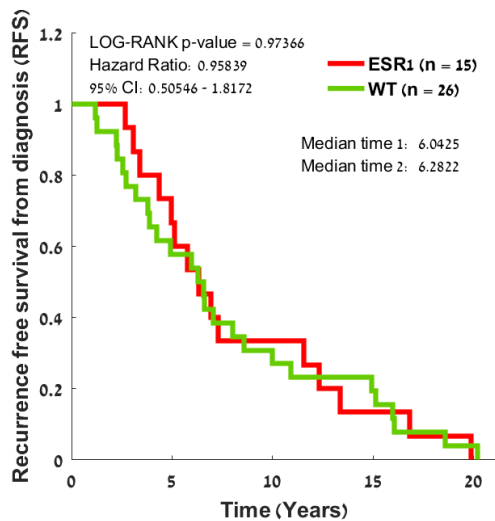

B

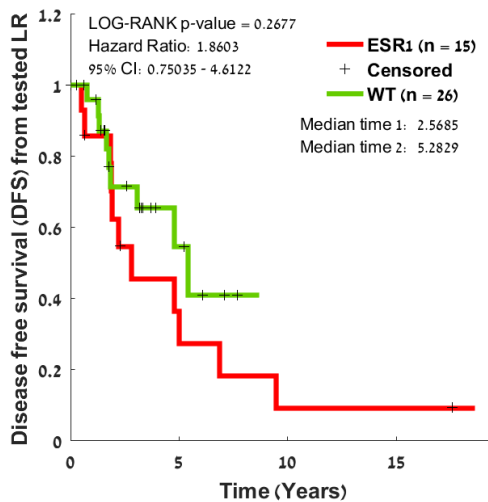

C

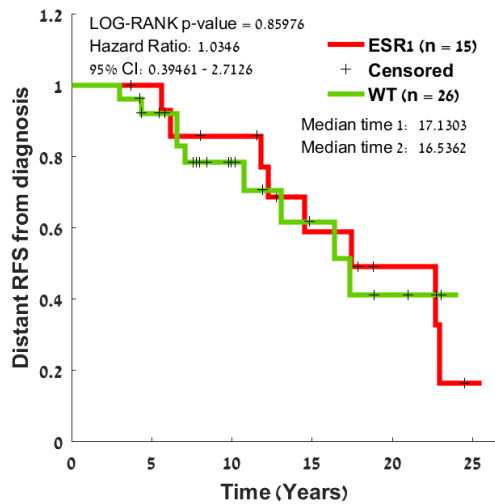

D

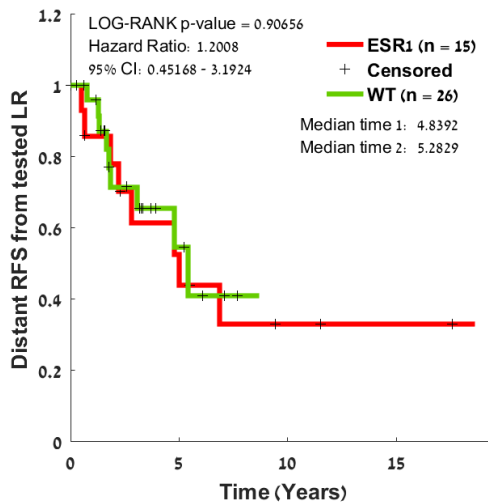

Supplement: MOESM1 [file 17620536]
